# Supplementary material
Source: publisher figshare collection journal article supplement (https://acs.figshare.com/ndownloader/files/17422001)
Supplement: Supplementary file 1 [file 17422001]

## Supporting Information

# A New Mass Spectrometry Based Approach for Organic Synthesis Monitoring

Veronica Termopoli<sup>1‡</sup>, Elena Torrisi<sup>4</sup>, Giorgio Famiglini<sup>1</sup>, Pierangela Palma<sup>1,2</sup>, Giovanni Zappia<sup>4</sup>,  
Achille Cappiello<sup>1,2\*</sup>

and

Gregory W. Vandergrift<sup>2,3‡</sup>, Misha Zvekic<sup>2</sup>, Erik T. Krogh<sup>2,3</sup>, Chris G. Gill<sup>2,3,5,6\*</sup>

<sup>1</sup> LC-MS Laboratory, Department of Pure and Applied Sciences, University of Urbino Carlo Bo, Urbino, Italy, 61029

<sup>2</sup> Applied Environmental Research Laboratories (AERL), Chemistry Department, Vancouver Island University, Nanaimo, BC, Canada, V9R 5S5

<sup>3</sup> Chemistry Department, University of Victoria, Victoria, BC, Canada, V8P 5C2

<sup>4</sup> Biomolecular Sciences Department, University of Urbino Carlo Bo, Urbino, Italy, 61029

<sup>5</sup> Chemistry Department, Simon Fraser University, Burnaby, BC, Canada, V5A 1S6

<sup>6</sup> Department of Environmental and Occupational Health Sciences, University of Washington, Seattle, WA, USA, 98195

## Corresponding Authors

\* Professor Chris G. Gill, Ph.D., P. Chem.

Co-Director, Applied Environmental Research Laboratories (AERL) Chemistry Department  
Vancouver Island University

900 Fifth Street, Nanaimo, BC

Canada V9R 5S5

Ph: 250-753-3245

[Chris.Gill@viu.ca](mailto:Chris.Gill@viu.ca)

\* Professor Achille Cappiello

LC-MS Laboratory, Department of Pure and Applied Sciences

University of Urbino

Piazza Rinascimento, 6

Urbino, Italy

Ph: +390722303344

[achille.cappiello@uniurb.it](mailto:achille.cappiello@uniurb.it)

## ORCID

Achille Cappiello: 0000-0002-6416-304X

Chris G. Gill: 0000-0001-7696-5894

‡ These authors contributed equally.

## Contents

Information on solvent and standard sources and preparation.

## Information on the Characterization of alkyl glycinate standards

|            |                                                                                                                     |
|------------|---------------------------------------------------------------------------------------------------------------------|
| Figure S-1 | Chlorobenzene UV-Vis and MS recorded traces                                                                         |
| Figure S-2 | Images of PDMS membrane for monitoring of catalytic conversion of phenylacetylene to acetophenone                   |
| Table S-1  | MS scan parameters                                                                                                  |
| Table S-2  | Biphenyl calibrations and response times for 10-50 mM solute concentrations in various organic solvents             |
| Table S-3  | Chlorobenzene calibrations and response times for 10-50 mM solute <b>concentrations</b> in various organic solvents |
| Table S-4  | Reactant and product calibrations and response times for oxidation reaction in methanol                             |
| Table S-5  | Reactant and product calibrations and response times for the alkylation reaction in acetonitrile                    |

## Standards and Solvents

All stock analyte solutions were prepared gravimetrically. Analyte sub-stocks and online additions of analytes were done volumetrically using a mechanical micropipette. Acetophenone (99%), biphenyl (99.5%), chlorobenzene (99.5%), and phenylacetylene (98%) were obtained from Sigma Aldrich (Oakville, ON, Canada). (*R*)- $\alpha$ -methyl benzylamine was obtained from Sigma Aldrich (Milan, Italy). Cyclohexane, NaCl, Na<sub>2</sub>SO<sub>4</sub> were obtained from Carlo Erba Reagents (Milan, Italy). Ethyl bromoacetate and triethylamine were purchased from VWR International (Milan, Italy). Acetonitrile, methanol, (HPLC grade) and ethyl acetate (99.9%) were obtained from VWR International (Edmonton, AB, Canada). Reagent alcohol (90% ethanol, 5% 2-propanol, 4.5% methanol, HPLC grade) and N,N-dimethylformamide (99.9%) were obtained from Fisher Scientific (Ottawa, ON, Canada). Reagent alcohol is referred to as ethanol for the purposes of this study. Dichloromethane ( $\geq 99.5\%$ ) was obtained from Sigma Aldrich. All analytical standards and reactants were ACS grade or better.

## Characterization of Alkyl Glycinate Standards

TLC (Cyclohexane:AcOEt, 60:40 v/v):  $R_f = 0.72$ ;

$[\alpha]_D = +33.56$  ( $c = 0.015$  M in CHCl<sub>3</sub>)

[Minor product Spectroscopic Characterization]:

<sup>1</sup>H NMR (400 MHz, CDCl<sub>3</sub>):  $\delta$  7.44 – 7.20 (m, 5H), 4.20 (q,  $J = 6.9$  Hz, 1H), 4.13 (q,  $J = 7.1$  Hz, 4H), 3.57 (s, 4H), 1.35 (d,  $J = 6.7$  Hz, 3H), 1.24 (t,  $J = 7.1$  Hz, 6H); <sup>13</sup>C NMR (125 MHz, CDCl<sub>3</sub>):  $\delta$  171.528, 144.100, 128.460, 127.493, 127.284, 77.355, 77.038, 76.720, 60.957, 60.410, 52.400, 20.937, 14.189; MS ( $m/z$ ): 293

TLC (Cyclohexane:AcOEt, 60:40 v/v):  $R_f = 0.50$ ;

$[\alpha]_D = +70.62$  ( $c = 0.026$  M in CHCl<sub>3</sub>); Literature value for (S)- enantiomer =  $-64.4$  ( $c = 2.27$  g/mL in CHCl<sub>3</sub>)<sup>S-1</sup>;

[Major product Spectroscopic Characterization]:

<sup>1</sup>H NMR (400 MHz, CDCl<sub>3</sub>):  $\delta$  7.36 – 7.21 (m, 5H, Ar), 4.16 (q,  $J = 7.1$  Hz, 2H), 3.80 (q,  $J = 6.6$  Hz, 1H), 3.35 – 3.16 (m, 2H), 1.99 (s, 1H), 1.39 (d,  $J = 6.6$  Hz, 3H), 1.25 (t,  $J = 7.2$  Hz, 3H), <sup>13</sup>C

NMR (125 MHz,  $\text{CDCl}_3$ ):  $\delta$  172.548, 144.581, 128.496, 127.153, 126.742, 77.354, 77.039, 76.719, 60.687, 57.735, 48.863, 24.207, 14.18; MS ( $m/z$ ): 207

## References

- S-1. Porzi, G. & Sandri, S. Enantioselective synthesis of (R)- and (S)-  $\alpha$ -aminoacids using (6S)- and (6R)-6-methyl-morpholine-2,5-dione derivatives. *Tetrahedron: Asymmetry* **7**, 189-196 (1996).

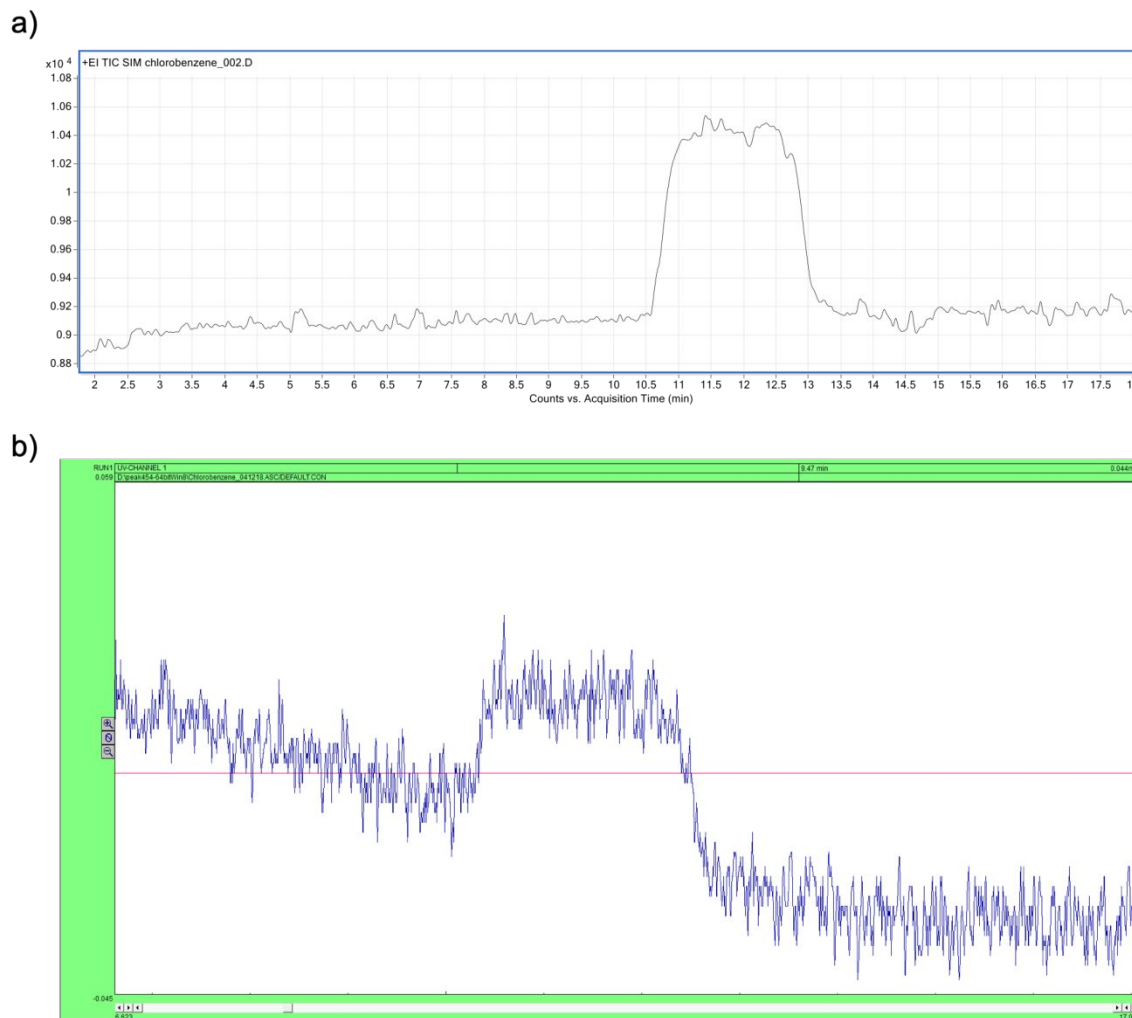

**Figure S-1:** Chlorobenzene MS and UV-Vis recorded traces at a concentration of 25 mM. a) Data measured by CP-MIMS-LEI ( $m/z=112$ ); b) simultaneous UV-Vis spectrophotometry detection for 25 mM in methanol ( $\lambda=260$  nm)

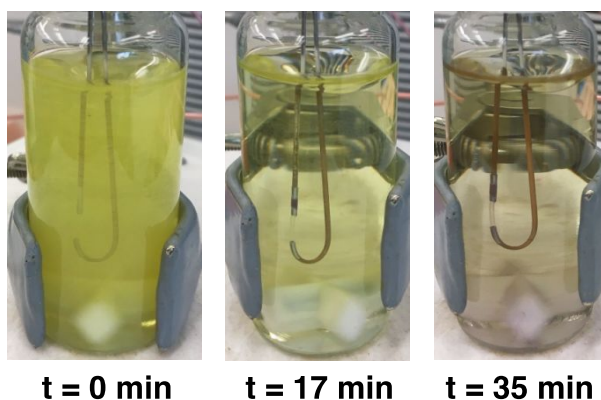

**Figure S-2:** Images of PDMS membrane during the monitoring of the catalytic conversion of phenylacetylene to acetophenone

**Table S-1:** MS scan parameters

| Analyte                     | MW /<br>(g/mol) | Scan Type <sup>a</sup> | ( <i>m/z</i> ) | Collision<br>Energy /<br>(eV) |
|-----------------------------|-----------------|------------------------|----------------|-------------------------------|
| Acetophenone                | 120.15          | SIM                    | 105            | -                             |
| Biphenyl                    | 154.21          | SIM                    | 154            | -                             |
| Chlorobenzene               | 112.56          | SIM                    | 112            | -                             |
| Phenylacetylene             | 102.13          | SIM                    | 102            | -                             |
| Ethyl bromoacetate          | 167.01          | MRM (Quant)            | 121→93         | 10                            |
|                             |                 | MRM (Qual)             | 138→120        | 5                             |
| $\alpha$ -Methylbenzylamine | 121.18          | MRM (Quant)            | 106→79         | 10                            |
|                             |                 | MRM (Qual)             | 106→77         | 10                            |
| Mono-alkylated product      | 207.26          | MRM (Quant)            | 192→91         | 10                            |
|                             |                 | MRM (Qual)             | 192→118        | 10                            |
| Dialkylated product         | 293.34          | MRM (Quant)            | 220→105        | 10                            |
|                             |                 | MRM (Qual)             | 278→107        | 5                             |

<sup>a</sup> Quant = quantitation transition, Qual = qualifying transition

**Table S-2:** Biphenyl calibrations and response times for 10-50 mM solute concentrations in various organic solvents

| Solvent               | Equation         | R <sup>2</sup> | t <sub>10-90%</sub> (min) |
|-----------------------|------------------|----------------|---------------------------|
| Acetonitrile          | y = 1.13x + 0.83 | 0.990          | 0.67                      |
| Dichloromethane       | y = 5.39x – 4.36 | 0.999          | 0.41                      |
| N,N-Dimethylformamide | y = 0.50x + 1.70 | 0.983          | 0.63                      |
| Ethanol               | y = 4.23x – 0.68 | 0.998          | 1.1                       |
| Methanol              | y = 2.41x + 3.89 | 0.994          | 0.68                      |

Triplicate measurements (intraday)

Risetimes calculated for 50 mM sample

**Table S-3:** Chlorobenzene calibrations and response times for 10-50 mM solute concentrations in various organic solvents

| Solvent               | Equation         | R <sup>2</sup> | t <sub>10-90%</sub> (min) |
|-----------------------|------------------|----------------|---------------------------|
| Acetonitrile          | y = 1.78x – 2.79 | 0.996          | 0.48                      |
| Dichloromethane       | y = 5.24x + 2.83 | 1.000          | 0.33                      |
| N,N-Dimethylformamide | y = 1.62x – 2.27 | 0.996          | 0.43                      |
| Ethanol               | y = 2.78x – 4.27 | 0.998          | 0.69                      |
| Methanol              | y = 2.57x – 2.42 | 0.999          | 0.33                      |

Triplicate measurements (intraday)

Risetimes calculated for 50 mM sample

**Table S-4:** Reactant and product calibrations and response times for oxidation reaction in methanol.

| Analyte         | Equation         | R <sup>2</sup> | t <sub>10-90%</sub> (min) |
|-----------------|------------------|----------------|---------------------------|
| Phenylacetylene | y = 16.8x – 29.7 | 0.999          | 0.35                      |
| Acetophenone    | y = 5.33x – 1.79 | 1.000          | 0.40                      |

Single Measurements in 95:4:1 methanol:de-ionized water:sulfuric acid v/v, 4 mM H<sub>2</sub>AuCl<sub>4</sub> with gentle heating (~50°C); 5-200 mM; Risetimes calculated for 90 mM sample

**Table S-5:** Reactant and product calibrations and response times for alkylation reaction in acetonitrile

| Analyte                             | Equation         | RSD (%) <sup>d</sup> | R <sup>2</sup> | t <sub>10-90%</sub> (min) |
|-------------------------------------|------------------|----------------------|----------------|---------------------------|
| Ethyl bromoacetate <sup>a</sup>     | y = 19.1x + 82.3 | 4                    | 0.999          | 0.23                      |
| α-Methylbenzylamine <sup>a</sup>    | y = 59.6x + 243  | 4                    | 0.999          | 0.42                      |
| Mono alkylated product <sup>b</sup> | y = 16.1x + 68.3 | -                    | 0.999          | 0.60                      |
| Dialkylated product <sup>c</sup>    | y = 4.85x + 1.36 | -                    | 1.000          | 1.2                       |

<sup>a</sup> Triplicate measurements (interday); Linearity range: 1-500 mM; LOQ: 1 mM; Risetimes calculated for 250 mM sample

<sup>b</sup> Duplicate measurements (interday); Linearity range: 1-250 mM; LOQ: 1 mM; Risettime calculated for 250 mM sample

<sup>c</sup> Single measurements; Linearity range: 10-75 mM; LOQ: 10 mM; Risettime calculated for 75 mM sample

<sup>d</sup> Reagents RSD (%) was calculated for 250 mM sample. No available statistical data for mono and dialkylated products.
